# Supplementary material for: hRUV: Hierarchical approach to removal of unwanted variation for large-scale metabolomics data
Source: Research Square preprint supplement (doi:10.21203/rs.3.rs-156243/v1), 2021-02-04
Supplement: Supplementary file 4 [file 2abe34be9da3efa122e5ac06.xlsx]

## Sheet: Sheet1
Supplementary Table 1. The batch sample arrangement design represented as a plate format used in the study to embed intra-batch and inter-batch sample replicates. There are 8 rows and 11 columns per batch, samples marked with "*" indicates intra-batch sample replicates and "***" indicates inter-batch sample replicates.
Plate and row ID	Column 1	Column 2	Column 3	Column 4	Column 5	Column 6	Column 7	Column 8	Column 9	Column 10	Column 11
Plate1_SR1	Pool 1	001	003	021	022	023	024	025	026	027	028
Plate1_SR2	Pool 2	024*	045	046	047	048	049	050	051	053	055
Plate1_SR3	Pool 3	056	058	059	060	061	055*	062	063	064	065
Plate1_SR4	Pool 4	066	067	068	069	070	062*	071	072	074	075
Plate1_SR5	Pool 5	076	077	078	079	080	081	067*	082	083	084
Plate1_SR6	Pool 6	085	086	087	081*	088	089	090	092	093	095
Plate1_SR7	Pool 7	090*	096	097	098	099	100	101	102	103	104
Plate1_SR8	Pool 8	106	107	108	111	112	113	103*	114	115	116
Plate2_SR1	Pool 9	074*	66*	55*	46*	89*	117	115*	118	119	120
Plate2_SR2	Pool 10	121	123	124	125	126	127	119*	28*	128	129
Plate2_SR3	Pool 11	130	131	132	133	134	123*	135	137	138	139
Plate2_SR4	Pool 12	140	141	133*	142	143	144	145	147	148	149
Plate2_SR5	Pool 13	152	153	154	155	156	157	158	147*	160	161
Plate2_SR6	Pool 14	162	154*	163	164	165	166	167	169	170	171
Plate2_SR7	Pool 15	172	174	175	176	165*	178	179	180	182	184
Plate2_SR8	Pool 16	185	186	174*	187	188	189	190	191	192	193
Plate3_SR1	Pool 17	160*	137*	117*	138*	192*	194	195	196	204	185*
Plate3_SR2	Pool 18	205	204*	206	207	209	210	211	212	213	215
Plate3_SR3	Pool 19	205*	217	218	219	221	222	223	224	225	226
Plate3_SR4	Pool 20	227	228	132*	229	226*	230	231	233	234	236
Plate3_SR5	Pool 21	237	238	239	240	241	242	243	233*	244	245
Plate3_SR6	Pool 22	246	243*	247	248	249	250	251	252	253	254
Plate3_SR7	Pool 23	255	256	257	258	253*	259	260	261	262	263
Plate3_SR8	Pool 24	264	257*	265	267	269	270	271	272	273	274
Plate4_SR1	Pool 25	212*	240*	231*	245*	256*	267*	275	276	277	278
Plate4_SR2	Pool 26	280	281	282	283	277*	284	285	286	287	288
Plate4_SR3	Pool 27	289	290	292	293	294	287*	295	296	297	298
Plate4_SR4	Pool 28	299	300	302	303	304	305	306	307	309	293*
Plate4_SR5	Pool 29	310	313	314	302*	315	316	317	318	319	321
Plate4_SR6	Pool 30	322	237*	323	324	325	327	317*	330	331	333
Plate4_SR7	Pool 31	334	335	336	337	323*	338	339	340	341	342
Plate4_SR8	Pool 32	343	344	345	346	338*	347	350	352	353	358
Plate5_SR1	Pool 33	338*	314*	334*	333*	289*	360	361	362	344*	363
Plate5_SR2	Pool 34	364	365	368	369	370	361*	371	372	373	374
Plate5_SR3	Pool 35	376	378	380	382	385	386	364*	387	388	392
Plate5_SR4	Pool 36	378*	393	394	395	396	397	398	399	400	401
Plate5_SR5	Pool 37	402	403	404	405	406	396*	407	408	410	411
Plate5_SR6	Pool 38	413	416	417	418	408*	419	420	421	422	423
Plate5_SR7	Pool 39	424	425	426	429	430	431	432	421*	433	434
Plate5_SR8	Pool 40	435	436	422*	438	342*	439	440	441	442	443
Plate6_SR1	Pool 41	402*	449*	393*	380*	369*	444	446	440*	447	448
Plate6_SR2	Pool 42	449	450	452	453	454	443*	455	456	457	458
Plate6_SR3	Pool 43	459	460	461	449*	462	463	464	465	466	467
Plate6_SR4	Pool 44	469	470	472	474	475	477	478	463*	479	480
Plate6_SR5	Pool 45	481	477*	482	483	485	486	487	489	490	491
Plate6_SR6	Pool 46	492	493	495	496	498	500	501	485*	502	503
Plate6_SR7	Pool 47	504	505	507	491*	508	509	510	511	512	513
Plate6_SR8	Pool 48	514	515	516	517	518	507*	519	520	522	523
Plate7_SR1	Pool 49	498*	483*	508*	490*	No Sample	524	525	520*	526	527
Plate7_SR2	Pool 50	528	530	525*	531	532	533	444*	534	535	536
Plate7_SR3	Pool 51	533*	537	538	539	540	541	545	546	547	548
Plate7_SR4	Pool 52	549	551	553	554	555	556	557	558	560	546*
Plate7_SR5	Pool 53	561	562	564	565	566	568	569	548*	570	571
Plate7_SR6	Pool 54	572	573	574	576	577	565*	578	579	580	582
Plate7_SR7	Pool 55	583	570*	585	586	587	588	590	591	593	595
Plate7_SR8	Pool 56	596	597	598	600	601	602	603	591*	604	605
Plate8_SR1	Pool 57	583*	527*	539*	549*	570*	600*	607	608	610	611
Plate8_SR2	Pool 58	612	613	614	615	616	619	620	621	605*	622
Plate8_SR3	Pool 59	623	624	625	626	628	630	631	611*	632	633
Plate8_SR4	Pool 60	634	635	636	541*	630*	637	638	639	640	641
Plate8_SR5	Pool 61	642	643	644	645	646	647	634*	648	649	650
Plate8_SR6	Pool 62	651	652	655	656	657	659	660	661	662	646*
Plate8_SR7	Pool 63	No Sample	663	664	665	666	667	668	669	670	671
Plate8_SR8	Pool 64	672	673	674	675	676	677	679	662*	680	681
Plate9_SR1	Pool 65	634*	647*	675*	661*	639*	682	683	684	674*	685
Plate9_SR2	Pool 66	687	689	690	691	692	693	683*	694	696	697
Plate9_SR3	Pool 67	689*	698	699	702	703	705	707	708	710	712
Plate9_SR4	Pool 68	713	714	715	716	717	719	720	722	723	703*
Plate9_SR5	Pool 69	724	725	728	731	713*	732	733	736	737	738
Plate9_SR6	Pool 70	724*	739	740	742	743	745	640*	746	747	748
Plate9_SR7	Pool 71	749	750	752	753	755	756	760	742*	761	762
Plate9_SR8	Pool 72	763	764	767	768	769	770	771	774	775	760*
Plate10_SR1	Pool 73	717*	760*	687*	712*	750*	761*	776	777	778	780
Plate10_SR2	Pool 74	781	782	783	784	785	774*	786	787	788	790
Plate10_SR3	Pool 75	784*	791	794	795	796	797	799	801	802	803
Plate10_SR4	Pool 76	804	805	790*	806	808	809	810	811	812	813
Plate10_SR5	Pool 77	814	815	816	803*	818	819	820	822	824	825
Plate10_SR6	Pool 78	826	827	818*	829	830	831	832	833	834	835
Plate10_SR7	Pool 79	836	829*	837	838	839	840	841	842	843	844
Plate10_SR8	Pool 80	845	846	847	848	760*	837*	849	850	851	852
Plate11_SR1	Pool 81	806*	814*	818*	822*	804*	853	854	855	844*	856
Plate11_SR2	Pool 82	857	852*	858	859	861	863	865	866	867	868
Plate11_SR3	Pool 83	869	871	874	876	877	878	880	859*	882	883
Plate11_SR4	Pool 84	884	869*	885	886	887	888	890	891	892	893
Plate11_SR5	Pool 85	894	895	896	897	884*	899	900	901	902	903
Plate11_SR6	Pool 86	904	905	906	907	908	900*	909	910	911	912
Plate11_SR7	Pool 87	906*	913	914	915	916	917	918	919	920	921
Plate11_SR8	Pool 88	922	924	925	926	927	920*	928	929	930	931
Plate12_SR1	Pool 89	910*	915*	927*	895*	896*	932	930*	934	935	936
Plate12_SR2	Pool 90	937	938	935*	939	940	941	942	943	854*	944
Plate12_SR3	Pool 91	945	946	947	951	952	938*	953	954	956	957
Plate12_SR4	Pool 92	958	959	960	947*	961	962	963	964	965	966
Plate12_SR5	Pool 93	967	968	969	970	961*	971	972	973	974	975
Plate12_SR6	Pool 94	976	977	978	979	980	982	972*	983	984	985
Plate12_SR7	Pool 95	987	988	989	990	991	992	994	995	979*	996
Plate12_SR8	Pool 96	997	998	999	1000	1001	1003	1004	1006	989*	1007
Plate13_SR1	Pool 97	985*	977*	966*	989*	976*	1008	1009	1006*	1010	1011
Plate13_SR2	Pool 98	1012	1013	1014	1009*	1015	1016	1017	1018	1019	1021
Plate13_SR3	Pool 99	1022	1023	1024	1025	1026	1027	1028	1011*	1029	1030
Plate13_SR4	Pool 100	1031	1032	1034	1035	952**	1023*	1036	1037	1038	1039
Plate13_SR5	Pool 101	1040	1041	1042	1043	1044	1045	1046	1034*	1047	1048
Plate13_SR6	Pool 102	1049	1050	1051	1052	1053	1054	1055	1057	1058	1039*
Plate13_SR7	Pool 103	1059	1060	1061	1062	1063	1064	1065	1066	1052*	1067
Plate13_SR8	Pool 104	1068	1069	1070	1071	1072	1073	1058*	1074	1075	1076
Plate14_SR1	Pool 105	1054*	1073*	1046*	1024*	1057*	1077	1078	1079	1067*	1080
Plate14_SR2	Pool 106	1081	1082	1083	1084	1077*	1085	1086	1087	1088	1089
Plate14_SR3	Pool 107	1090	1091	1092	1093	1086*	1094	1095	1096	1097	1098
Plate14_SR4	Pool 108	1099	1100	1101	1102	1105	1093*	1106	1107	1108	1109
Plate14_SR5	Pool 109	1110	1111	1112	1113	1114	1105*	1115	1116	1118	1119
Plate14_SR6	Pool 110	1120	1121	1122	1123	1046*	1124	1111*	1126	1127	1128
Plate14_SR7	Pool 111	1129	1131	1132	1133	1134	1135	1136	1137	1127*	1138
Plate14_SR8	Pool 112	1140	1143	1144	1136*	1145	1146	1147	1148	1149	1151
Plate15_SR1	Pool 113	1084*	1090*	1127*	1081*	1105*	1152	1153	1138*	1154	1155
Plate15_SR2	Pool 114	1156	1157	1158	1159	1160	1161	1154*	1162	1163	1164
Plate15_SR3	Pool 115	1167*	1166	1167	1168	1169	1170	1171	1172	1173	1174
Plate15_SR4	Pool 116	1171*	1175	1176	1177	1178	1179	1180	1183	1184	1185
Plate15_SR5	Pool 117	1187	1188	1189	1190	1191	1183*	1192	1193	1194	1195
Plate15_SR6	Pool 118	1196	1197	1198	1200	1190*	1201	1203	1204	1205	1206
Plate15_SR7	Pool 119	1208	1209	1210	1211	1212	1213	1214	1215	1206*	1216
Plate15_SR8	Pool 120	1218	1219	1220	1222	1224	1225	1226	1227	1228	1230
Plate15_SR9	NA	1231	1232	1233
